# Supplementary material for: Electrochemiluminescence Sensor Based on CeO2 Nanocrystalline for Hg2+ Detection in Environmental Samples
Source: MDPI journal article supplement (doi:10.3390/molecules29010001), 2023-12-19
Supplement: s1 [file s1]

*Supporting Information*

# **Electrochemiluminescence Sensor Based on CeO<sub>2</sub> Nanocrystalline for Hg<sup>2+</sup> Detection in Environment Samples**

**Chunyuan Tian<sup>1</sup>, Feiyan Tang<sup>1</sup>, Wei Guo<sup>2,\*</sup>, Minggang Wei<sup>1</sup>, Li Wang<sup>1</sup>, Xuming Zhuang<sup>1</sup> and Feng Luan<sup>1,\*</sup>**

<sup>1</sup> College of Chemistry and Chemical Engineering, Yantai University, Yantai 264005, China

<sup>2</sup> Shandong Dyne Marine Biopharmaceutical Co., Ltd, Weihai 264300, China

\* Correspondence: guodawei0298@163.com (W.G.); fluan@sina.com (F.L.)

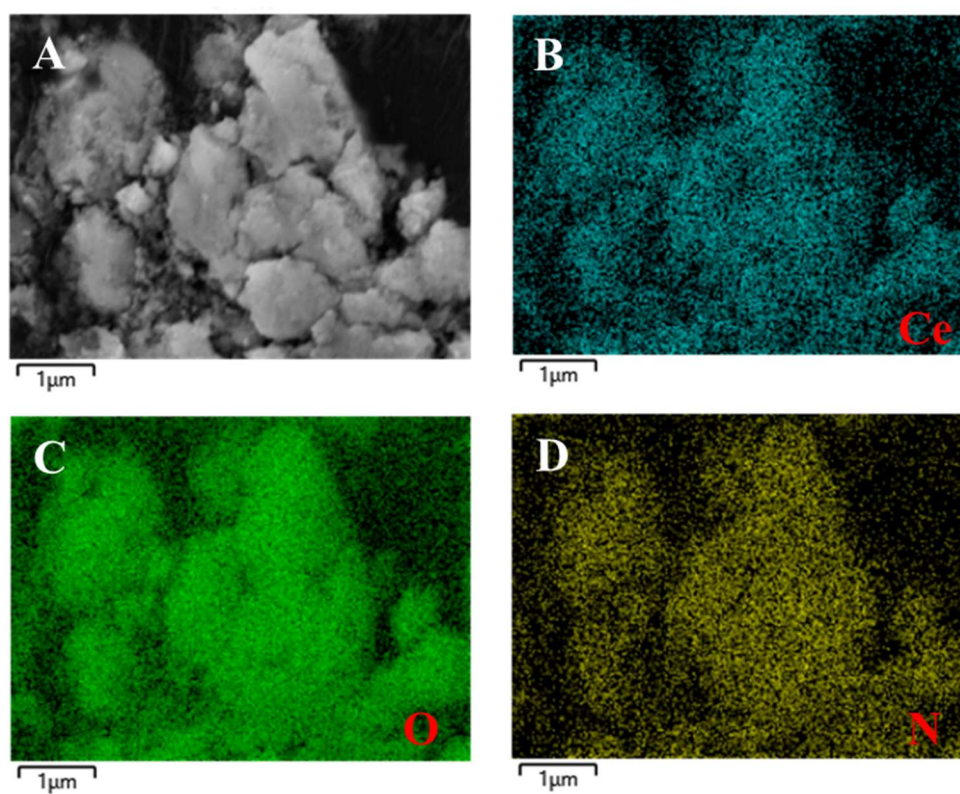

**Figure S1.** EDS-Mapping images of (A)  $\text{CeO}_2$ ; (B) Ce; (C) O; (D) N.

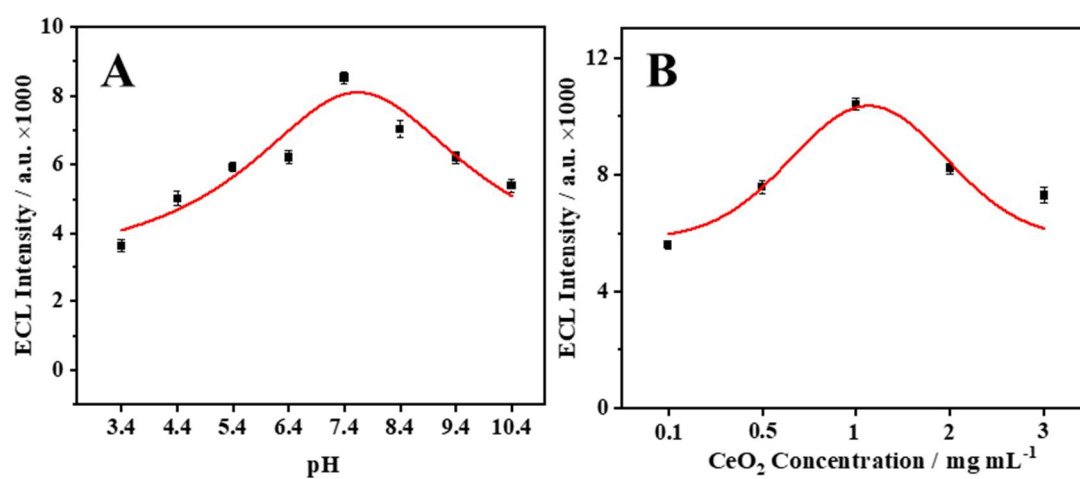

**Figure S2.** (A) Optimization of pH of ECL sensing environment; (B) The concentration of the  $\text{CeO}_2$  solution dripped onto the electrode surface.

**Table S1.** Comparison between CeO<sub>2</sub> ECL sensor and other methods for detecting Hg<sup>2+</sup>.

| Probe materials                          | Testing method      | Linear range | LODs     | Ref.      |
|------------------------------------------|---------------------|--------------|----------|-----------|
| MoS <sub>2</sub> @Au NPs                 | FL                  | 0.02-1 μM    | 9.41 nM  | 1         |
| HMA <sup>a</sup> /Eu <sup>3+</sup> -CdS  | PEC <sup>b</sup>    | 0.1-1 μM     | 0.067 μM | 2         |
| CuS HNSs <sup>c</sup>                    | UV-Vis <sup>d</sup> | 50 pM-400 nM | 50 pM    | 3         |
| Au NPs/PLL <sup>e</sup> -BP <sup>f</sup> | EC <sup>g</sup>     | 1-500 nM     | 0.14 nM  | 4         |
| CeO <sub>2</sub> NPs                     | ECL                 | 10 pM-100μM  | 0.35 pM  | This work |

<sup>a</sup> hydrophobically modified alginate (HMA)<sup>b</sup> photoelectrochemistry (PEC)<sup>c</sup> hollow nanospheres (HNSs)<sup>d</sup> ultraviolet–visible (UV-Vis)<sup>e</sup> poly-L-lysine (PLL)<sup>f</sup> black phosphorus (BP)<sup>g</sup> electrochemistry (EC)

## Reference

1. Liu, C.; Tuffour, A.; Liao, J.H.; Li, M.L.; Lv, Q.X.; Zhou, D.R.; Gao, L. Highly sensitive detection of  $\text{Hg}^{2+}$  using molybdenum disulfide-DNA sensors. *Chem. Phys.* **2020**, 534, 110758.
2. Bu, Y.W.; Wang, K.; Yang, X.Y.; Nie, G.M. Photoelectrochemical sensor for detection  $\text{Hg}^{2+}$  based on in situ generated MOFs-like structures. *Anal. Chim. Acta*, **2022**, 1233, 340496.
3. Fang, Y.M.; Zhang, Y.; Cao, L.G.; Yang, J.Z.; Hu, M.H.; Pang, Z.L.; He, J.H. Portable  $\text{Hg}^{2+}$  Nanosensor with ppt Level Sensitivity Using Nanozyme as the Recognition Unit, Enrichment Carrier, and Signal Amplifier. *ACS Appl. Mater. Interfaces*, **2020**, 12(10), 11761- 11768.
4. Zhou, J.; Wei, D.; Hu, C.C.; Li, S.; Ma, L.; Chen, Z.; Deng, Y. A simple label-free electrochemical aptamer sensor for detection of  $\text{Hg}^{2+}$  based on black phosphorus. *Mater. Express*, **2022**, 12(6), 802- 809.
